# Supplementary material
Source: MDPI journal article supplement (https://www.mdpi.com/2076-3417/13/15/8668)
Supplement: s1 [file s1]

## Supplementary Material

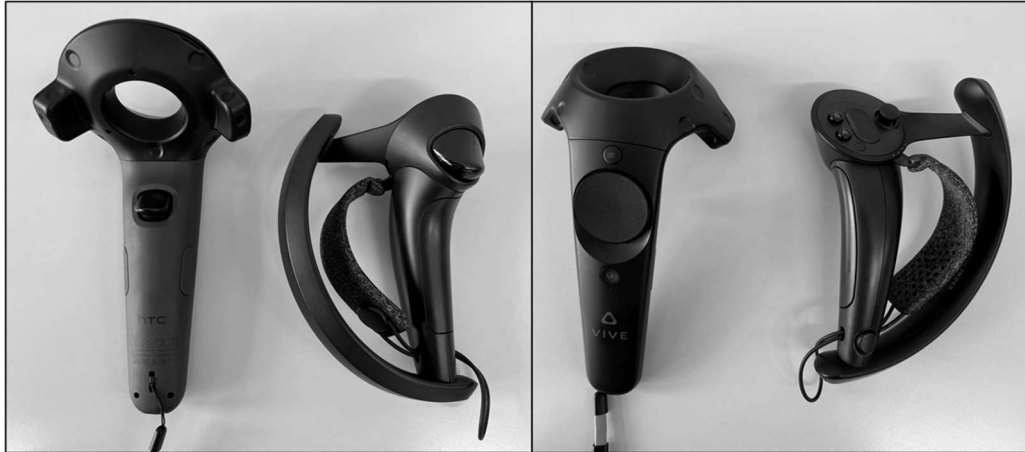

**Figure S1.** VR controllers examined.

**Table S1.** Test design rotary control.

| Run | A:Angular resolution [°/s] | B:Diameter [mm] | C:Inclination [°] | D:Haptic feedback | E:Acoustic feedback | F:Hand visualization | G:Shape  | H:Position of the subject | J:Input device | K:VR environment |
|-----|----------------------------|-----------------|-------------------|-------------------|---------------------|----------------------|----------|---------------------------|----------------|------------------|
| 1   | 10                         | 40              | 45                | No                | No                  | No                   | Knurling | Sitting                   | Valve Index    | Crane            |
| 2   | 45                         | 110             | 0                 | No                | Yes                 | No                   | Cylinder | Sitting                   | Valve Index    | Crane            |
| 3   | 45                         | 40              | 45                | Yes               | No                  | No                   | Knob     | Standing                  | Valve Index    | Crane            |
| 4   | 45                         | 40              | 0                 | No                | Yes                 | Yes                  | Knurling | Standing                  | HTC Vive       | Table            |
| 5   | 10                         | 80              | 0                 | Yes               | No                  | Yes                  | Cylinder | Standing                  | Valve Index    | Table            |
| 6   | 21                         | 40              | 0                 | No                | No                  | Yes                  | Cylinder | Standing                  | HTC Vive       | Crane            |
| 7   | 10                         | 110             | 45                | No                | No                  | No                   | Knurling | Sitting                   | Valve Index    | Table            |
| 8   | 17                         | 110             | 90                | Yes               | Yes                 | Yes                  | Knurling | Standing                  | Valve Index    | Crane            |
| 9   | 41                         | 110             | 45                | Yes               | No                  | No                   | Knurling | Sitting                   | HTC Vive       | Table            |
| 10  | 17                         | 110             | 90                | Yes               | Yes                 | Yes                  | Knurling | Standing                  | Valve Index    | Crane            |
| 11  | 10                         | 40              | 0                 | Yes               | Yes                 | Yes                  | Knob     | Sitting                   | HTC Vive       | Table            |
| 12  | 45                         | 40              | 45                | Yes               | No                  | No                   | Knob     | Standing                  | Valve Index    | Crane            |
| 13  | 14                         | 40              | 90                | Yes               | No                  | Yes                  | Knob     | Standing                  | Valve Index    | Table            |
| 14  | 45                         | 80              | 90                | No                | No                  | Yes                  | Knob     | Sitting                   | Valve Index    | Table            |
| 15  | 41                         | 110             | 45                | Yes               | No                  | No                   | Knurling | Sitting                   | HTC Vive       | Table            |
| 16  | 45                         | 110             | 90                | Yes               | Yes                 | No                   | Cylinder | Standing                  | Valve Index    | Table            |
| 17  | 45                         | 80              | 90                | No                | No                  | Yes                  | Knob     | Sitting                   | Valve Index    | Table            |
| 18  | 10                         | 80              | 90                | No                | Yes                 | No                   | Cylinder | Standing                  | HTC Vive       | Table            |
| 19  | 10                         | 80              | 90                | No                | Yes                 | No                   | Cylinder | Standing                  | HTC Vive       | Table            |
| 20  | 45                         | 40              | 90                | Yes               | No                  | Yes                  | Cylinder | Sitting                   | HTC Vive       | Crane            |
| 21  | 23                         | 80              | 45                | Yes               | Yes                 | No                   | Knob     | Sitting                   | Valve Index    | Crane            |
| 22  | 10                         | 110             | 0                 | No                | No                  | Yes                  | Knob     | Standing                  | HTC Vive       | Crane            |
| 23  | 20                         | 80              | 45                | Yes               | No                  | Yes                  | Cylinder | Sitting                   | Valve Index    | Crane            |
| 24  | 20                         | 40              | 0                 | No                | No                  | No                   | Knob     | Standing                  | Valve Index    | Table            |
| 25  | 20                         | 80              | 0                 | Yes               | Yes                 | Yes                  | Knob     | Sitting                   | HTC Vive       | Crane            |
| 26  | 20                         | 20              | 90                | Yes               | Yes                 | No                   | Cylinder | Sitting                   | HTC Vive       | Crane            |
| 27  | 20                         | 80              | 0                 | Yes               | No                  | No                   | Knurling | Standing                  | HTC Vive       | Table            |
| 28  | 5                          | 80              | 90                | Yes               | No                  | Yes                  | Knurling | Sitting                   | HTC Vive       | Crane            |
| 29  | 20                         | 40              | 0                 | Yes               | No                  | Yes                  | Cylinder | Sitting                   | Valve Index    | Table            |
| 30  | 20                         | 20              | 0                 | No                | Yes                 | Yes                  | Knurling | Standing                  | Valve Index    | Table            |
| 31  | 5                          | 20              | 90                | No                | Yes                 | Yes                  | Cylinder | Standing                  | HTC Vive       | Crane            |
| 32  | 20                         | 80              | 0                 | No                | No                  | No                   | Knob     | Standing                  | HTC Vive       | Crane            |

**Table S2.** Test design joystick.

| Run | A:Max. positioning speed [%/s] | B:Max. Angle of deflection [°] | C:Size [mm] | D:Position of the subject | E:Shape    | F:VR environment | G:Angular resolution | H:Input device | J:Haptic feedback | K:Acoustic feedback | L:Visual feedback | M:Hand visualization |
|-----|--------------------------------|--------------------------------|-------------|---------------------------|------------|------------------|----------------------|----------------|-------------------|---------------------|-------------------|----------------------|
| 1   | 2.5                            | 10                             | 15 / 7 cm   | Sitting                   | vertical   | Table            | 3-stage              | HTC Vive       | Yes               | No                  | No                | Yes                  |
| 2   | 10                             | 10                             | 15 / 7 cm   | Sitting                   | horizontal | Crane            | 5-stage              | HTC Vive       | Yes               | No                  | No                | No                   |
| 3   | 10                             | 30                             | 24 / 11 cm  | Standing                  | horizontal | Table            | 5-stage              | Valve Index    | Yes               | No                  | No                | Yes                  |
| 4   | 10                             | 30                             | 32 / 15 cm  | Standing                  | horizontal | Crane            | 3-stage              | HTC Vive       | No                | No                  | Yes               | Yes                  |
| 5   | 2.5                            | 30                             | 15 / 7 cm   | Standing                  | horizontal | Crane            | linear               | Valve Index    | Yes               | Yes                 | Yes               | Yes                  |
| 6   | 2.5                            | 45                             | 15 / 7 cm   | Sitting                   | vertical   | Crane            | 3-stage              | HTC Vive       | No                | Yes                 | Yes               | Yes                  |
| 7   | 2.5                            | 30                             | 15 / 7 cm   | Standing                  | vertical   | Table            | linear               | HTC Vive       | No                | No                  | No                | No                   |
| 8   | 10                             | 30                             | 15 / 7 cm   | Standing                  | vertical   | Table            | 3-stage              | Valve Index    | Yes               | Yes                 | Yes               | No                   |
| 9   | 5                              | 30                             | 24 / 11 cm  | Sitting                   | horizontal | Table            | 5-stage              | HTC Vive       | No                | Yes                 | Yes               | Yes                  |
| 10  | 5                              | 10                             | 24 / 11 cm  | Sitting                   | vertical   | Crane            | linear               | HTC Vive       | Yes               | No                  | Yes               | No                   |
| 11  | 2.5                            | 45                             | 15 / 7 cm   | Sitting                   | horizontal | Crane            | 3-stage              | Valve Index    | No                | No                  | No                | No                   |
| 12  | 5                              | 30                             | 24 / 11 cm  | Sitting                   | horizontal | Table            | 5-stage              | HTC Vive       | No                | Yes                 | Yes               | Yes                  |
| 13  | 2.5                            | 10                             | 15 / 7 cm   | Standing                  | horizontal | Crane            | 5-stage              | HTC Vive       | No                | No                  | Yes               | No                   |
| 14  | 2.5                            | 30                             | 32 / 15 cm  | Sitting                   | horizontal | Crane            | 3-stage              | Valve Index    | No                | Yes                 | No                | No                   |
| 15  | 2.5                            | 30                             | 15 / 7 cm   | Standing                  | horizontal | Crane            | linear               | Valve Index    | Yes               | Yes                 | Yes               | Yes                  |
| 16  | 2.5                            | 30                             | 32 / 15 cm  | Sitting                   | vertical   | Table            | 5-stage              | Valve Index    | Yes               | No                  | Yes               | Yes                  |
| 17  | 2.5                            | 30                             | 32 / 15 cm  | Sitting                   | vertical   | Table            | 5-stage              | Valve Index    | Yes               | No                  | Yes               | Yes                  |
| 18  | 10                             | 10                             | 32 / 15 cm  | Sitting                   | vertical   | Table            | linear               | HTC Vive       | Yes               | Yes                 | No                | Yes                  |
| 19  | 10                             | 30                             | 24 / 11 cm  | Sitting                   | vertical   | Crane            | linear               | Valve Index    | No                | Yes                 | No                | No                   |
| 20  | 10                             | 45                             | 24 / 11 cm  | Standing                  | vertical   | Crane            | 5-stage              | Valve Index    | No                | Yes                 | No                | Yes                  |
| 21  | 10                             | 30                             | 15 / 7 cm   | Standing                  | vertical   | Table            | 3-stage              | Valve Index    | Yes               | Yes                 | Yes               | No                   |
| 22  | 5                              | 10                             | 24 / 11 cm  | Sitting                   | vertical   | Crane            | linear               | HTC Vive       | Yes               | No                  | Yes               | No                   |
| 23  | 2.5                            | 45                             | 32 / 15 cm  | Standing                  | horizontal | Table            | 5-stage              | HTC Vive       | Yes               | Yes                 | Yes               | No                   |
| 24  | 2.5                            | 45                             | 24 / 11 cm  | Standing                  | horizontal | Table            | 3-stage              | Valve Index    | Yes               | No                  | No                | Yes                  |
| 25  | 10                             | 45                             | 15 / 7 cm   | Sitting                   | horizontal | Table            | linear               | Valve Index    | No                | No                  | Yes               | No                   |
| 26  | 5                              | 30                             | 24 / 11 cm  | Sitting                   | horizontal | Table            | 3-stage              | HTC Vive       | Yes               | No                  | Yes               | No                   |
| 27  | 5                              | 30                             | 15 / 7 cm   | Sitting                   | vertical   | Table            | 5-stage              | HTC Vive       | Yes               | Yes                 | No                | No                   |
| 28  | 12                             | 30                             | 32 / 15 cm  | Sitting                   | horizontal | Table            | linear               | HTC Vive       | Yes               | No                  | No                | Yes                  |
| 29  | 5                              | 10                             | 32 / 15 cm  | Sitting                   | horizontal | Table            | linear               | Valve Index    | No                | Yes                 | No                | No                   |
| 30  | 5                              | 15                             | 24 / 11 cm  | Standing                  | vertical   | Table            | 3-stage              | Valve Index    | No                | Yes                 | Yes               | Yes                  |
| 31  | 5                              | 30                             | 24 / 11 cm  | Sitting                   | horizontal | Table            | 3-stage              | HTC Vive       | Yes               | No                  | Yes               | No                   |
| 32  | 10                             | 10                             | 15 / 7 cm   | Standing                  | vertical   | Table            | linear               | Valve Index    | No                | No                  | Yes               | No                   |
| 33  | 12                             | 10                             | 24 / 11 cm  | Standing                  | horizontal | Crane            | 3-stage              | Valve Index    | Yes               | Yes                 | Yes               | Yes                  |
| 34  | 10                             | 30                             | 15 / 7 cm   | Sitting                   | vertical   | Table            | 5-stage              | Valve Index    | No                | No                  | Yes               | Yes                  |
| 35  | 5                              | 30                             | 15 / 7 cm   | Sitting                   | vertical   | Table            | 5-stage              | HTC Vive       | Yes               | Yes                 | No                | No                   |
